# Supplementary material for: Adjuvant Pam3CSk4 does not improve the immunization against Cryptococcus gattii infection in C57BL/6 mice
Source: PeerJ. 2023 Jan 31;11:e14778. doi: 10.7717/peerj.14778 (PMC9897066; doi:10.7717/peerj.14778)
Supplement: Supplemental Information 1 [file peerj-11-14778-s001.xlsx]

## Sheet: Fig. 1
Figure 1B (O.D.)					Figure 1C (O.D.)
PBS	Immunized	Immunized + P3C4 (1 μg)	Immunized + P3C4 (10 μg)		PBS	Immunized	Immunized + P3C4 (1 μg)	Immunized + P3C4 (10 μg)
0.254	0.179	0.332	0.232		0.58	0.271	0.389	0.268
0.221	0.292	0.339	0.2		0.41	0.364	0.381	0.281
0.46	0.33	0.362	0.202		0.234	0.45	0.314	0.403
0.254	0.188	0.277	0.18		0.596	0.302	0.263	0.289
0.406	0.36	0.276	0.191		0.384	0.294	0.505	0.344
0.317	0.245	0.324			0.141	0.409	0.5
0.305	0.293				0.207	0.379
0.281	0.137				0.186	0.463
0.242	0.18				0.466	0.384
0.207	0.142				0.299	0.221
Figure 1D (O.D.)
	PBS										Immunized										Immunized + P3C4 (1 μg)					Immunized + P3C4 (10 μg)
IgG1	0.016	0	0.03	0.019	0.027	0.015	0.01	0.008	0.006	0.004	0.039	0.031	0.027	0.026	0.027	0.018	0.012	0	0.066	0	0	0.003	0.007	0	0	0	0	0.017	0.02	0
IgG2a	0.032	0.033	0.016	0.011	0.012	0.018	0	0.007	0.005	0.011	0.056	0.027	0.031	0.031	0.029	0.023	0.014	0.01	0.021	0.002	0.007	0.005	0	0	0	0	0.013	0.007	0.01	0.008
IgG2b	0.396	0.388	0.471	0.281	0.444	0.785	0.521	0.526	0.501	0.492	0.82	0.377	0.341	0.377	0.387	0.569	0.584	0.282	0.585	0.314	0.534	0.519	0.283	0.218	0.435	0.311	0.53	0.527	0.436	0.55
IgG3	0.419	0.232	0.192	0.147	0.232	0.237	0.151	0.245	0.157	0.114	0.42	0.209	0.314	0.188	0.269	0.225	0.193	0.103	0.112	0.054	0.409	0.372	0.176	0.146	0.278	0.133	0.124	0.127	0.106	0.09
IgA	0.31	0.405	0.537	0.19	0.36	0.194	0.199	0.15	0.153	0.188	0.636	0.333	0.291	0.462	0.461	0.168	0.206	0.251	0.53	0.284	0.123	0.15	0.187	0.089	0.156	0.197	0.218	0.334	0.301	0.363
IgM	0.544	0.352	0.327	0.365	0.45	0.727	0.229	0.311	0.305	0.257	0.874	0.427	0.557	0.239	0.261	0.746	0.524	0.281	0.425	0.224	0.39	0.243	0.445	0.164	0.388	0.135	0.367	0.291	0.151	0.139
Kappa	1.463	1.859	1.499	1.424	1.418	1.675	1.586	1.549	1.539	1.45	1.609	1.535	1.517	1.526	1.478	1.54	1.673	1.481	1.508	1.583	1.709	1.565	1.582	1.319	1.415	1.594	1.714	1.778	1.609	1.939
Lambda	0.732	1.355	0.842	0.714	0.751	1.67	0.926	1.389	1.04	1.096	1.34	1.026	0.91	0.962	0.983	1.461	1.069	1.236	0.975	0.78	0.827	1.052	0.847	0.697	1.421	0.644	1.199	1.49	0.878	0.919

## Sheet: Fig. 2
Figure 2A (IFN-γ - pg/mg)					Figure 2B (IL-12p70 - pg/mg)					Figure 2C (TNF-α - pg/mg)					Figure 2D (IL-1β - pg/mg)
PBS	Immunized	Immunized + P3C4 (1 μg)	Immunized + P3C4 (10 μg)		PBS	Immunized	Immunized + P3C4 (1 μg)	Immunized + P3C4 (10 μg)		PBS	Immunized	Immunized + P3C4 (1 μg)	Immunized + P3C4 (10 μg)		PBS	Immunized	Immunized + P3C4 (1 μg)	Immunized + P3C4 (10 μg)
8,632838*	4.5103	3.13989	0		65.7979	52.1157	48.8641	14.1034		21.1791	10.3655	14.0917	12.5998		0	2.39488	17.3724	0
2.39778	2.59732	5.15385	0		30.8618	39.4891	62.0333	16.6738		11.4965	6.06538	17.1495	12.6982		0.986733	0	7.35075	1.55342
1,089746*	6.41022	3.8566	2.00977		13.4093	62.0684	67.6221	32.6709		2.71049	1.60539	16.4557	13.6077		0.109467	0	31.4414	22.3344
2.31454	7.01754	0	0		31.1799	62.8766	68.377	8.30813		5.54626	20.1672	18.0227	9.74025		0	0	0	2.31809
2.25577	0.723334	5.45448	0		42.1696	24.1485	65.5982	11.2627		10.491	10.0124	13.0175	4.51438		0	0	0	0
1.54147	8.75358	10.2961			16.6495	100.772	64.2495			13.5708	31.1204	4.66951			31.5109	0
7.47899	2.9233				78.9755	41.9799				21.2394	2.8488				0.0916087	3.37579
0.621281	1.2292				24.4017	15.4894				11.5872	0.717095				4.84884	23.4756
7.47961	1.52327				93.8068	14.1518				24.0172	7.28942				2.64818	7.527
3.04842	7.42642				53.9413	76.6925				15.5104	27.1966					7.95226
Figure 2E (IL-2 - pg/mg)					Figure 2F (IL-17 - pg/mg)					Figure 2G (IL-6 - pg/mg)					Figure 2H (IL-10 - pg/mg)
PBS	Immunized	Immunized + P3C4 (1 μg)	Immunized + P3C4 (10 μg)		PBS	Immunized	Immunized + P3C4 (1 μg)	Immunized + P3C4 (10 μg)		PBS	Immunized	Immunized + P3C4 (1 μg)	Immunized + P3C4 (10 μg)		PBS	Immunized	Immunized + P3C4 (1 μg)	Immunized + P3C4 (10 μg)
0.472638	0.369937	0.657647	0.526689		5.87141	1.46075	14.4997	3.89997		3.49755	2.66262	1.71615	0		22.5847	12.8835	7.15508	0.914813
0.492912	0.266966	0.552524	0.357805		1.38523	1.25365	11.9642	3.17602		1.08683	2.21416	5.99887	0.258895		4.96333	9.13184	10.611	0
0.16447	0.244028	0.576584	0.316748		1.1352	1.45902	17.7185	3.53223		1.06557	2.83543	11.6579	2.90526		2.23487	13.6375	10.7703	4.60462
0.220493	0.76638	0.439001	0.296716		1.56869	2.06254	2.38162	4.36195		1.36275	2.6302	0	0		5.40451	12.6614	0	0
0.535276	0.475827	0.306607	0.260614		1.48363	0.850384	12.2466	2.19372		1.7637	0.147042	12.141	0		5.87817	1.49152	11.0853	0
0.760515	0.918354				1.31798	3.03249	4.11371			0.470033	2.66918	4.35232			0	13.3374	20.9755
0.618419	0.199063				3.43846	1.28879				4.92628	1.46707				11.6924	6.24315
0.560536	0.092652				1.40179	1.22615				0.456069	6.22607				2.03347	3.01741
1.01341	0.204745				3.92432	1.62803				3.93942	7.71757				16.0239	1.58776
	0.802809				2.03628	3.01064				2.42067	4.19713				8.41856	10.9381
Figure 2I (IL-4 - pg/mg)					Figure 2J (IFN-γ - pg/mg)					Figure 2K (IL-17 - pg/mg)					Figure 2L (IL-4 - pg/mg)
PBS	Immunized	Immunized + P3C4 (1 μg)	Immunized + P3C4 (10 μg)		PBS	Immunized	Immunized + P3C4 (1 μg)	Immunized + P3C4 (10 μg)		PBS	Immunized	Immunized + P3C4 (1 μg)	Immunized + P3C4 (10 μg)		PBS	Immunized	Immunized + P3C4 (1 μg)	Immunized + P3C4 (10 μg)
5.16035	12.5904	1.5733	2.44843		72.6676	16.9558	89.6233	53.2895		78.943	83.3287	206.129	140.343		0	0	21.2024	9.27604
0.537813	0.486728	2.66748	9.79424		21.8003	41.1783	84.7788	53.2895		61.4001	17.5429	61.4001	118.414		0	0	0	29.1533
0.641077	0.83738	2.203	2.22387		147.757	79.9343	41.1783	55.7118		127.186	43.8572	96.4859	171.043		0	1.32515	0	82.1593
1.26494	3.93109	0.770551	2.39571		82.3566	67.8231	4.8445	99.3123		65.7858	105.257	30.7	65.7858		11.9263	0	0	22.5275
1.44005	1.4407	1.4387	1.00201		147.757	82.3566	264.025	94.4678		57.0144	109.643	92.1001	57.0144		0	0	0	15.9018
2.04682	0.901809	2.47557			65.4008	0	104.157			122.8	105.257	30.7			0	0	0
3.60618	9.37058				48.445	46.0228				96.4859	61.4001				0	0
9.2235	2.27825				67.8231	111.424				92.1001	21.9286				3.97545	9.27604
13.4868	0.311178				19.378	297.937				105.257	171.043				0	0
9.01268	4.94116				12.1113	38.756				30.7	96.4859				0	0

## Sheet: Fig. 3
Figure 3A (%)					Figure 3B (%)
PBS	Immunized	Immunized + P3C4 (1 μg)	Immunized + P3C4 (10 μg)		PBS	Immunized	Immunized + P3C4 (1 μg)	Immunized + P3C4 (10 μg)
43.52	72.94	38.51	14.72		26.9	26.07	7.62	13.79
58.79	83.92	39.44	11.84		15.84	33.39	11.26	22.26
33.01	87.08	78.17	22.46		8.99	17.46	9.15	11.26
39.63	75.08	75.98	21.36		23.46	9.85	3.28	11.41
76	63.07	45.8	42.56		20.74	13.73	6.42	5.26
37.32	74.38	56.17			21.79	10.69	10.4
56.43	53.67	42.49			19.79	9.33
37.28	72.59	34.5			19.36	15.12
38.19	70.61	36.76			40.7	4.46
67.52	65.08	71.55			23.23	17.16
11.44	23.07	42.9
28.95	11.37	54.74
24.92	9.98
26.14	12.17
15.3
Figure 3C (%)					Figure 3D (%)
PBS	Immunized	Immunized + P3C4 (1 μg)	Immunized + P3C4 (10 μg)		PBS	Immunized	Immunized + P3C4 (1 μg)	Immunized + P3C4 (10 μg)
5.59	2.94	3.2	3.39		3.86	4.53	10.58	5.43
2.3	3.05	2.83	3.22		5.97	2.02	9.56	4.41
3.3	2.05	3.69	1.48		3.7	5.51	13.79	4.97
2.34	2.49	1.95	3.55		5.48	2.71	3	4.37
2.36	3.33	2.57	1.17		3.62	3.97	12.68	1.7
5.9	3.22	3.21			9.18	3.27	11.71
2.9	0.87				7.77	6.73
4.14	1.4				8.29	2.35
4	0.49				6.04	4.46
	2.24					7.65
Figure 3E (MFI)
PBS	Immunized	Immunized + P3C4 (1 μg)	Immunized + P3C4 (10 μg)
48.49	60.43	42.56	33.12
37.08	38.57	39.63	35.68
41.25	56.55	44.13	36.88
38.15	69.07	33.17	42.52
35.22	73.3	49.26	38.47
48.61	38.79	33.12
60.42	36.37
58.51	49.25
37.62	50.93
	41.59

## Sheet: Fig. 4
Figure 4A (relative expression)					Figure 4B (relative expression)					Figure 4C (relative expression)
PBS	Immunized	Immunized + P3C4 (1 μg)	Immunized + P3C4 (10 μg)		PBS	Immunized	Immunized + P3C4 (1 μg)	Immunized + P3C4 (10 μg)		PBS	Immunized	Immunized + P3C4 (1 μg)	Immunized + P3C4 (10 μg)
0.574349	1.1487	5.27803	2.2974		4	4	2	1.3566		1	1	0.395021	2
0.808971	0.977338	1.31951	1.1487		1	0.125	0.273025	0.339151		1	1	0.395021	1
2.10068	2.2974	0.659754	1.82619		0.0625	1	2	2.34068		0.5	1.42922	0.0987552	1
1.1487	31.789	0.329877	2.2974		4	2	0.03125	2.71321		2	0.5	0.0493776	1
0.886152	1.1487	47.7004	2.2974		1	0.25	2.95054	0.169576		1.58008	0.5	3.57001	0.25
1.75482	21.1121	1.31951			0.339151	0.0211969	4			0.395021	5.87794	0.19751
0.329877	2.63902				1.91078	1.3566				1.58008	1.58008
1.31951	2.63902				2.48089	1.3566					3.16017
1.31951	2.63902				1.3566	4.69282					0.395021
	0.329877				0.446517	0.678302
Figure 4D (relative expression)					Figure 4E (relative expression)					Figure 4F (relative expression)
PBS	Immunized	Immunized + P3C4 (1 μg)	Immunized + P3C4 (10 μg)		PBS	Immunized	Immunized + P3C4 (1 μg)	Immunized + P3C4 (10 μg)		PBS	Immunized	Immunized + P3C4 (1 μg)	Immunized + P3C4 (10 μg)
2.22545	2.22545	0.278182	0.475593		0.5	2	2	4.25424		4	0.5	16	2.53654
0.326044	2.22545	2.22545	0.955162		0.5	2	2	1.86568		0.25	4	8.03373	1.26827
2.22545	1.00676	0.278182	0.951186		2	3.61907	1	2.12712		0.773008	8	8	5.07307
0.278182	4.45091	1.11273	0.475593		2	4	2	1.06356		0.634134	0.634134	0.94804	2.53654
2.22545	0.139091	0.139091	0.0594491		1	1	1.35235	1.06356		2.53654	1.26827	8	0.107794
2.44276	0.951186	0.139091			3.12541	1.06356	2			0.634134	1.81263	4
0.951186	0.475593				0.531779	0.648501				1.26827	5.07307
1.90237	0.475593				1.06356	2.12712					1.26827
0.237797	0.0138214				1.06356	1.06356
0.951186	0.118898				0.531779	1.06356
Figure 4G (relative expression)					Figure 4H (relative expression)
PBS	Immunized	Immunized + P3C4 (1 μg)	Immunized + P3C4 (10 μg)		PBS	Immunized	Immunized + P3C4 (1 μg)	Immunized + P3C4 (10 μg)
3.45815	1.72907	0.864537	2.51403		1.79589	0.90125	1.11982	0.338335
0.864537	0.432269	3.45815	0.157127		0.342405	1.8025	0.517579	0.514057
1.25701	1.18236	0.864537			714.109	0.90125	2.04002	1.02811
1.25701	1.25701				1.8025	1.32667	0.450625	1.02811
2.14645	2.51403				0.90125	0.90125	0.450625	0.128514
0.628507	1.25701				1.02811	1.02811	0.450625
	0.314253				2.05623	1.02811
					1.02811	1.02811
					0.514057	1.02811
					0.877791	0.257028

## Sheet: Fig. 5
Figure 5A (CFU/mg)
PBS	Immunized	Immunized + P3C4 (1 μg)	Immunized + P3C4 (10 μg)
983.82	456.27	7402.05	9349.63
4660.87	14527	10562.8	25935.8
15571.7	22585.8	28201.9	20376.2
8944	32548.4	21131.8	60.84
		3931.82

## Sheet: Fig. 6
	Figure 6B (%)
	PBS	Immunized	Immunized + P3C4 (1 μg)	Immunized + P3C4 (10 μg)
	64.75	72.64	38.24	78.09
	62.68	77.64	37.99	77.51
	51.97	75.74	55.76	66.64
	47.95	70.44	17.3	77.41
	33.42	61.6	51	64.96
	29.58	49.66	34.88	59.48
	31.92	59.05	45.73	54.44
	33.23	64.63	26.98	62.48
	34.48	54.71	36.41	69.86
	22.74	71.83	50.46	68.13
	25.56	63.26	39.55	64.44
	36.95	60.41	49.85	65.49
	58.66	58.17	39.29	56.69
	61.12	60.96	41.41	61.98
	71.77	71.85	38.42	54.23
	53.15	76.18	18.65	67.03
	56.61	66.29	33.96	63.98
	38.53	63.71	44.33	51.6
	53.01	63.97	24.81	54
	52.14	57.05	40.18	58.25
	40.12	40.88
	43.52	36.04
	34.57	37.77
	44.09	41.55
	41.52	45.75
	38.51	66.11
	47.88	45.96
	41.32	58.84
		46.23
		22.46
		41.95
		30.59
		46.04
		33.79
		35.59
		17.05
